# Supplementary material
Source: HighWire-hosted journal article supplement (https://jcp.bmjjournals.com/content/suppl/2005/07/11/58.4.352)
Supplement: 584352figstable.pdf [file 584352figstable.pdf]

**Figure S1: Flow Diagram of cases**

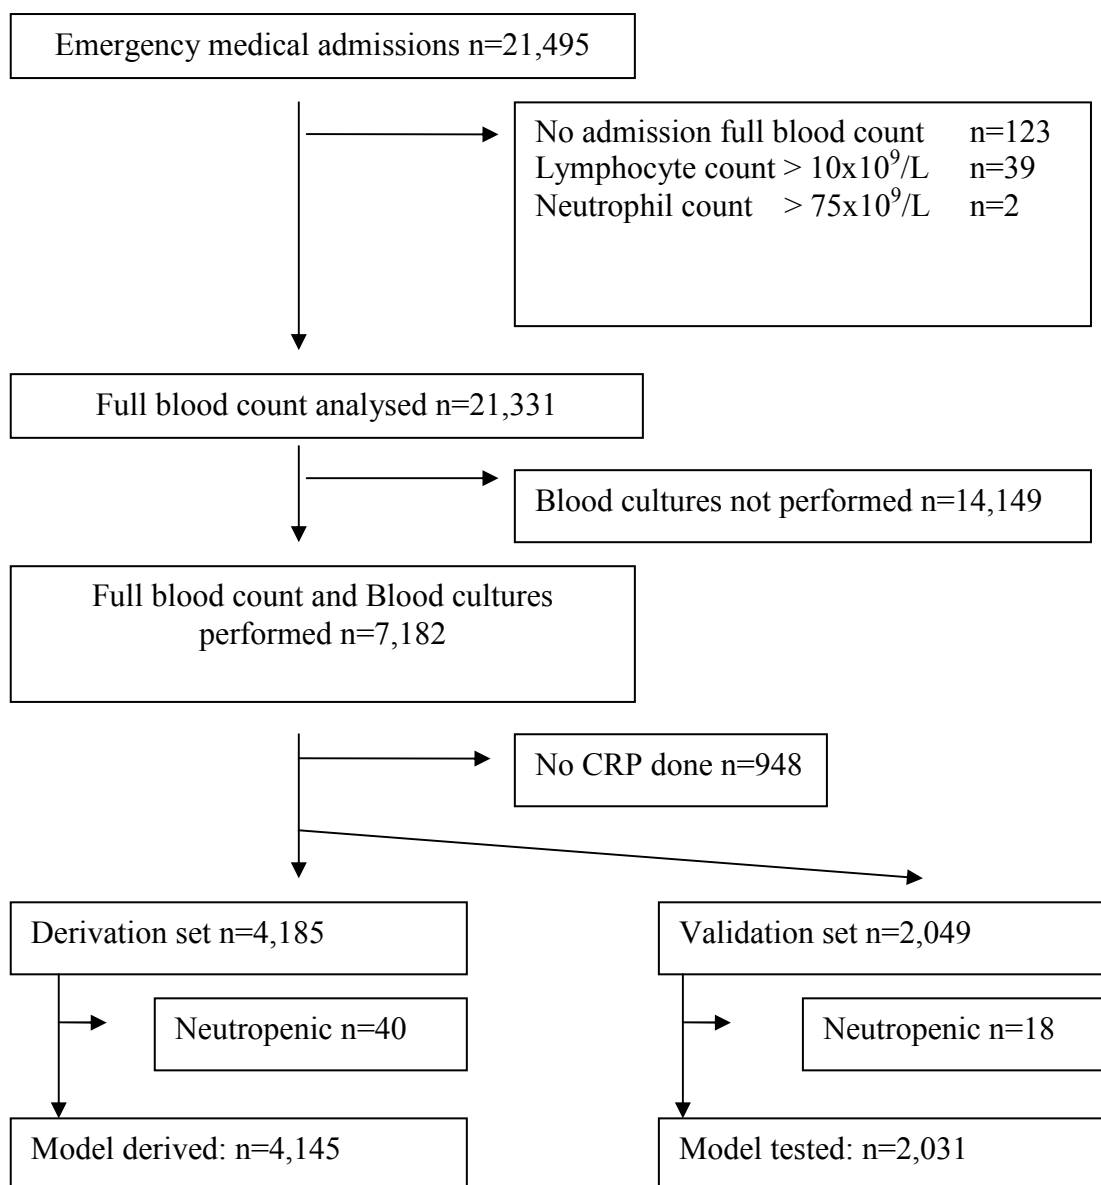

**Figure S1: Legend**

This is a flow diagram illustrating the cases used in the study.

**Figure S2: Bacteraemia odds by component**

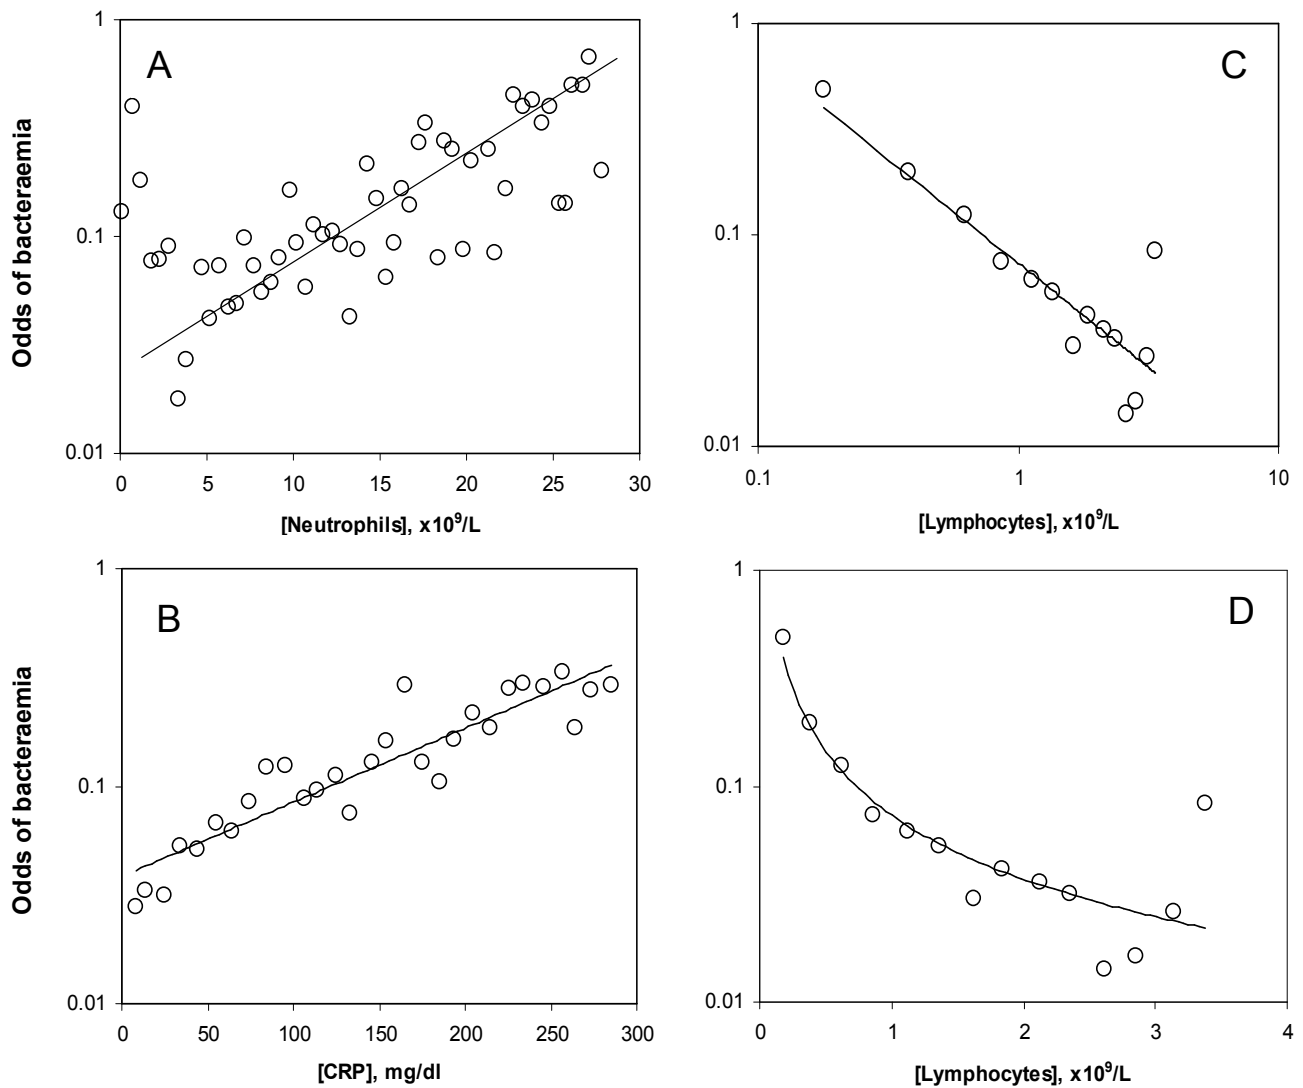

**Figure S2 Legend**

The 6,234 blood cultured cases were analysed in strata, as described in Methods. The odds of bacteraemia are plotted for each stratum, each represented by a single dot on the chart. Lines are least squares regression lines modelling log odds (Y axis) against counts (A-C) or log counts (D). The fit in panel A omits the first two strata, which represent cases with neutrophil counts less than  $1 \times 10^9/L$ . In interpretation of the plots, it may be helpful to remember that for small Odds ( $<0.2$ ), Probability  $\approx$  Odds, since Probability = Odds / (1+Odds).

Inspection of Figure S2 suggests that those cases with neutrophil counts of 1.0-1.49 (the third point) may also have increased risk (Figure 1), but this is not robust since this point is based on only 2 bacteraemic and 11 non bacteraemic cases.

**Table S1: Distribution of CRP, Neutrophil and Lymphocyte counts**

| Blood culture              | CRP, mg/L    | Neutrophil count x 10 <sup>9</sup> /L |         |         |           |           |        | Lymphocyte count x 10 <sup>9</sup> /L |           |           |           |           |           |        |
|----------------------------|--------------|---------------------------------------|---------|---------|-----------|-----------|--------|---------------------------------------|-----------|-----------|-----------|-----------|-----------|--------|
|                            |              | <1.0                                  | 1.0-4.9 | 5.0-9.9 | 10.0-14.9 | 15.0-19.9 | >=20.0 | 0.00-0.24                             | 0.25-0.49 | 0.50-0.74 | 0.75-0.99 | 1.00-1.49 | 1.50-1.99 | >=2.00 |
| Not cultured               | Not measured | 9                                     | 1821    | 1978    | 393       | 79        | 21     | 16                                    | 125       | 271       | 462       | 1076      | 936       | 1415   |
|                            | <10          | 11                                    | 2631    | 2642    | 429       | 71        | 13     | 20                                    | 103       | 362       | 589       | 1594      | 1394      | 1735   |
|                            | 10-49        | 5                                     | 725     | 1422    | 320       | 62        | 24     | 26                                    | 120       | 284       | 382       | 775       | 458       | 513    |
|                            | 50-99        | 1                                     | 133     | 440     | 157       | 36        | 20     | 6                                     | 58        | 125       | 148       | 216       | 132       | 102    |
|                            | 100-149      | 3                                     | 38      | 194     | 100       | 25        | 16     | 13                                    | 37        | 56        | 71        | 100       | 57        | 42     |
|                            | 150-199      | 0                                     | 11      | 73      | 52        | 22        | 7      | 2                                     | 21        | 26        | 23        | 50        | 25        | 18     |
|                            | 200-249      | 0                                     | 6       | 32      | 31        | 11        | 4      | 6                                     | 12        | 12        | 16        | 20        | 7         | 11     |
|                            | >=250        | 1                                     | 8       | 26      | 27        | 7         | 12     | 2                                     | 14        | 21        | 10        | 18        | 9         | 7      |
| No Significant bacteraemia | Not measured | 5                                     | 176     | 400     | 171       | 84        | 37     | 24                                    | 93        | 124       | 149       | 234       | 118       | 131    |
|                            | <10          | 11                                    | 474     | 768     | 185       | 37        | 17     | 21                                    | 92        | 154       | 210       | 384       | 289       | 342    |
|                            | 10-49        | 14                                    | 412     | 792     | 299       | 77        | 37     | 32                                    | 166       | 227       | 254       | 416       | 300       | 236    |
|                            | 50-99        | 8                                     | 169     | 494     | 190       | 73        | 25     | 28                                    | 112       | 158       | 162       | 242       | 143       | 114    |
|                            | 100-149      | 6                                     | 64      | 315     | 190       | 75        | 43     | 22                                    | 56        | 118       | 140       | 200       | 90        | 67     |
|                            | 150-199      | 1                                     | 27      | 157     | 122       | 45        | 28     | 12                                    | 43        | 61        | 77        | 109       | 41        | 37     |
|                            | 200-249      | 8                                     | 23      | 87      | 77        | 38        | 29     | 6                                     | 32        | 45        | 44        | 85        | 28        | 22     |
|                            | >=250        | 1                                     | 21      | 85      | 120       | 78        | 57     | 17                                    | 49        | 75        | 62        | 90        | 39        | 30     |
| Significant bacteraemia    | Not measured | 1                                     | 5       | 32      | 16        | 10        | 11     | 6                                     | 16        | 22        | 8         | 12        | 7         | 4      |
|                            | <10          | 2                                     | 12      | 16      | 8         | 1         | 0      | 3                                     | 7         | 7         | 5         | 6         | 3         | 8      |
|                            | 10-49        | 0                                     | 15      | 21      | 11        | 3         | 7      | 8                                     | 19        | 7         | 5         | 11        | 4         | 3      |
|                            | 50-99        | 3                                     | 10      | 35      | 15        | 7         | 10     | 9                                     | 10        | 23        | 16        | 15        | 4         | 3      |
|                            | 100-149      | 1                                     | 1       | 27      | 17        | 11        | 8      | 5                                     | 8         | 21        | 11        | 10        | 3         | 7      |
|                            | 150-199      | 0                                     | 3       | 22      | 17        | 10        | 9      | 8                                     | 10        | 13        | 12        | 9         | 6         | 3      |
|                            | 200-249      | 1                                     | 4       | 17      | 15        | 9         | 11     | 8                                     | 11        | 10        | 11        | 14        | 1         | 2      |
|                            | >=250        | 2                                     | 6       | 25      | 22        | 20        | 21     | 16                                    | 30        | 22        | 8         | 15        | 3         | 2      |

**Table S1: Legend**

This shows the distribution of CRP, lymphocyte and neutrophil counts within the study cohort.

**Table S2: Comparability of derivation and validation sets**

| Blood culture | Variable                         | Derivation | Validation |
|---------------|----------------------------------|------------|------------|
| Negative      | CRP, mg/L                        | 76.3       | 72.9       |
|               | Hb g/dl                          | 12.7       | 12.7       |
|               | Lymphocytes x 10 <sup>9</sup> /L | 1.29       | 1.32       |
|               | Neutrophils x 10 <sup>9</sup> /L | 8.89       | 8.97       |
|               | Platelets x 10 <sup>9</sup> /L   | 282        | 284        |
|               | Died as inpatients               | 9.0%       | 9.0%       |
|               | Age                              | 64         | 65         |
|               | Duration of stay                 | 8.45       | 8.72       |
| Positive      | CRP, mg/L                        | 147        | 140        |
|               | Hb g/dl                          | 12.1       | 12.4       |
|               | Lymphocytes x 10 <sup>9</sup> /L | .846       | .865       |
|               | Neutrophils x 10 <sup>9</sup> /L | 11.9       | 13.5       |
|               | Platelets x 10 <sup>9</sup> /L   | 243        | 268        |
|               | Died as inpatients               | 21%        | 21%        |
|               | Age                              | 69         | 67         |
|               | Duration of stay                 | 12.6       | 12.8       |

**Table S2: Legend**

This compares the properties of cases in derivation and validation sets.
